# Supplementary material
Source: Elsevier journal article supplement (https://www.sciencedirect.com/science/article/pii/S1885585725003585)
Supplement: mmc1 [file mmc1.pdf]

## MATERIAL ADICIONAL

**Tabla S1**

Características de la población según supervivencia o no a los 6 meses de seguimiento

|                                      | Vivos<br>490 (77,0%) | Fallecimiento<br>146 (23,0%) | OR (IC95%)       | p       |
|--------------------------------------|----------------------|------------------------------|------------------|---------|
| <i>Datos demográficos</i>            |                      |                              |                  |         |
| Edad > 85 años                       | 267 (54,5)           | 99 (67,8)                    | 1,76 (1,19-2,60) | 0,004   |
| Sexo femenino                        | 268 (55,7)           | 75 (51,4)                    | 0,86 (0,60-1,27) | 0,479   |
| Sin estudios/estudios primarios      | 362 (74,5)           | 107 (74,3)                   | 0,99 (0,65-1,52) | 0,965   |
| Casado/en pareja                     | 201 (41,0)           | 57 (39,0)                    | 0,92 (0,63-1,34) | 0,669   |
| Reside en zona rural                 | 104 (21,2)           | 39 (26,7)                    | 1,35 (0,88-2,07) | 0,163   |
| Institucionalizado                   | 39 (8,0)             | 16 (11,0)                    | 1,42 (0,77-2,63) | 0,258   |
| Cuidador familiar                    | 382 (78,9)           | 114 (79,7)                   | 1,05 (0,66-1,67) | 0,837   |
| > 2 ingresos previos por IC          | 151 (30,8)           | 62 (42,5)                    | 1,66 (1,13-2,42) | 0,009   |
| Tiempo evolución IC ≥ 4 años         | 248 (50,7)           | 85 (58,6)                    | 1,38 (0,95-2,00) | 0,094   |
| <i>Situación funcional</i>           |                      |                              |                  |         |
| Clase avanzada de la NYHA            | 209 (42,7)           | 94 (64,4)                    | 2,43 (1,66-3,56) | < 0,001 |
| FRAIL > 2 puntos                     | 270 (55,1)           | 108 (74,0)                   | 2,32 (1,54-3,49) | < 0,001 |
| Índice de Barthel < 80               | 195 (39,8)           | 76 (52,1)                    | 1,64 (1,13-2,38) | 0,009   |
| <i>Comorbilidades</i>                |                      |                              |                  |         |
| Diabetes mellitus                    | 211 (43,1)           | 65 (44,5)                    | 1,06 (0,73-1,54) | 0,755   |
| EPOC                                 | 117 (23,9)           | 45 (30,8)                    | 1,42 (0,94-2,14) | 0,091   |
| Hipertensión arterial                | 439 (89,6)           | 128 (87,7)                   | 0,83 (0,47-1,46) | 0,512   |
| Arteriopatía periférica              | 70 (14,3)            | 21 (14,4)                    | 1,01 (0,60-1,71) | 0,976   |
| Accidente cerebrovascular            | 82 (16,7)            | 19 (13,0)                    | 0,74 (0,43-1,27) | 0,280   |
| Enfermedad renal crónica             | 297 (60,6)           | 104 (71,2)                   | 1,61 (1,08-2,40) | 0,020   |
| Anemia                               | 283 (57,8)           | 104 (71,2)                   | 1,81 (1,21-2,70) | 0,003   |
| Demencia                             | 18 (3,7)             | 8 (5,5)                      | 1,52 (0,65-3,57) | 0,333   |
| FA/aleteo                            | 354 (72,2)           | 113 (77,4)                   | 1,32 (0,85-2,03) | 0,216   |
| Valvulopatía moderada-grave          | 222 (45,3)           | 84 (57,5)                    | 1,64 (1,13-2,38) | 0,009   |
| Cardiopatía isquémica                | 123 (25,1)           | 44 (30,1)                    | 1,29 (0,86-1,94) | 0,225   |
| Dispositivos                         | 67 (13,7)            | 24 (16,4)                    | 1,24 (0,75-2,06) | 0,402   |
| <i>FEVI y péptidos natriuréticos</i> |                      |                              |                  |         |
| FEVI < 50%                           | 62 (12,7)            | 30 (20,7)                    | 1,79 (1,10-2,90) | 0,017   |
| NT-proBNP ≥ 4.483 pg/ml              | 205 (45,5)           | 82 (64,6)                    | 2,19 (1,45-3,29) | < 0,001 |
| <i>Preferencias del paciente</i>     |                      |                              |                  |         |
| Prioriza longevidad                  | 41 (8,5)             | 6 (4,2)                      | 0,48 (0,20-1,14) | 0,090   |
| Sí RCP/no decidido                   | 357 (73,9)           | 89 (63,6)                    | 0,62 (0,41-0,92) | 0,017   |
| Deseo de fallecer en el hospital     | 193 (40,5)           | 61 (43,3)                    | 1,12 (0,68-1,64) | 0,533   |
| Voluntad de solicitar la eutanasia   | 75 (15,3)            | 20 (14,0)                    | 0,88 (0,52-1,50) | 0,645   |

EPOC: enfermedad pulmonar obstructiva crónica; FA: fibrilación auricular; FEVI: fracción de eyección del ventrículo izquierdo; IC: insuficiencia cardíaca; IC95%: intervalo de confianza del 95%; NT-proBNP: fracción aminoterminal del propéptido natriurético cerebral (tipo B); NYHA: *New York Heart Association*; OR: *odds ratio*; RCP: reanimación cardiopulmonar.

**Tabla S2**

Características de la población según reingresos por insuficiencia cardiaca o no a los 6 meses de seguimiento

|                                      | No reingresan<br>380 (62,0%) | Reingresan<br>233 (38,0%) | OR (IC95%)       | p       |
|--------------------------------------|------------------------------|---------------------------|------------------|---------|
| <i>Datos demográficos</i>            |                              |                           |                  |         |
| Edad > 85 años                       | 204 (53,7)                   | 144 (61,8)                | 1,40 (1,00-1,95) | 0,049   |
| Sexo femenino                        | 206 (54,2)                   | 124 (53,2)                | 0,96 (0,69-1,33) | 0,811   |
| Sin estudios/estudios primarios      | 274 (72,7)                   | 174 (75,7)                | 1,17 (0,80-1,70) | 0,419   |
| Casado/en pareja                     | 172 (45,3)                   | 82 (35,2)                 | 0,66 (0,47-0,92) | 0,014   |
| Reside en zona rural                 | 72 (18,9)                    | 64 (27,5)                 | 1,62 (1,10-2,38) | 0,014   |
| Institucionalizado                   | 30 (7,9)                     | 21 (9,0)                  | 1,16 (0,64-2,07) | 0,627   |
| Cuidador familiar                    | 287 (76,7)                   | 189 (82,2)                | 1,40 (0,92-2,11) | 0,112   |
| > 2 ingresos previos por IC          | 99 (26,1)                    | 102 (43,8)                | 2,21 (1,36-3,12) | < 0,001 |
| Tiempo evolución de IC ≥ 4 años      | 182 (48,0)                   | 136 (58,6)                | 1,53 (1,10-2,13) | 0,011   |
| <i>Situación funcional</i>           |                              |                           |                  |         |
| Clase avanzada de la NYHA            | 156 (41,1)                   | 133 (57,1)                | 1,91 (1,37-2,66) | < 0,001 |
| FRAIL > 2 puntos                     | 214 (56,3)                   | 148 (63,5)                | 1,35 (0,97-1,89) | 0,078   |
| Índice de Barthel < 80               | 137 (36,1)                   | 128 (54,9)                | 2,16 (1,55-3,02) | < 0,001 |
| <i>Comorbilidades</i>                |                              |                           |                  |         |
| Diabetes mellitus                    | 154 (40,5)                   | 108 (46,4)                | 1,27 (0,91-1,76) | 0,157   |
| EPOC                                 | 92 (25,3)                    | 60 (25,8)                 | 1,03 (0,71-1,49) | 0,893   |
| Hipertensión arterial                | 336 (88,4)                   | 211 (90,6)                | 1,26 (0,73-2,16) | 0,407   |
| Arteriopatía periférica              | 62 (16,3)                    | 26 (11,2)                 | 0,65 (0,39-1,05) | 0,077   |
| Accidente cerebrovascular            | 61 (16,1)                    | 39 (16,7)                 | 1,05 (0,68-1,63) | 0,824   |
| Enfermedad renal crónica             | 227 (59,7)                   | 159 (68,2)                | 1,45 (1,03-2,04) | 0,034   |
| Anemia                               | 221 (58,2)                   | 150 (64,4)                | 1,30 (0,93-1,82) | 0,126   |
| Demencia                             | 16 (4,2)                     | 9 (3,9)                   | 0,91 (0,40-2,10) | 0,833   |
| FA/aleteo                            | 281 (73,9)                   | 174 (74,7)                | 1,04 (0,72-1,51) | 0,841   |
| Valvulopatía moderada-grave          | 177 (46,6)                   | 120 (51,5)                | 1,22 (0,88-1,69) | 0,236   |
| Cardiopatía isquémica                | 101 (26,6)                   | 57 (24,5)                 | 0,89 (0,62-1,30) | 0,561   |
| Dispositivos                         | 49 (12,9)                    | 36 (15,5)                 | 1,23 (0,78-1,97) | 0,374   |
| <i>FEVI y péptidos natriuréticos</i> |                              |                           |                  |         |
| FEVI < 50%                           | 48 (12,7)                    | 37 (16,1)                 | 1,32 (0,83-2,10) | 0,237   |
| NT-proBNP > 4.483 pg/ml              | 159 (45,4)                   | 111 (54,1)                | 1,42 (1,01-2,01) | 0,047   |
| <i>Preferencias del paciente</i>     |                              |                           |                  |         |
| Prioriza longevidad                  | 32 (2,6)                     | 13 (5,7)                  | 0,64 (0,33-1,24) | 0,184   |
| Sí RCP/no decidido                   | 271 (72,8)                   | 160 (69,9)                | 0,86 (0,60-1,24) | 0,431   |
| Deseo de fallecer en el hospital     | 146 (39,8)                   | 99 (43,6)                 | 1,17 (0,84-1,64) | 0,357   |
| Voluntad de solicitar la eutanasia   | 55 (14,7)                    | 38 (16,5)                 | 1,14 (0,73-1,80) | 0,557   |

EPOC: enfermedad pulmonar obstructiva crónica; FA: fibrilación auricular; FEVI: fracción de eyección del ventrículo izquierdo; IC: insuficiencia cardiaca; IC95%: intervalo de confianza del 95%; NT-proBNP: fracción aminoterminal del propéptido natriurético cerebral (tipo B); NYHA: *New York Heart Association*; OR: *odds ratio*; RCP: reanimación cardiopulmonar.

**Tabla S3**

Características de la población según si precisan asistencia en urgencias o no a los 6 meses de seguimiento

|                                      | Sin visitas a urgencias por IC, 401 (65,7%) | Con visitas a urgencias por IC, 209 (34,3%) | OR (IC95%)       | p       |
|--------------------------------------|---------------------------------------------|---------------------------------------------|------------------|---------|
| <i>Datos demográficos</i>            |                                             |                                             |                  |         |
| Edad > 85 años                       | 217 (54,1)                                  | 130 (62,2)                                  | 1,39 (0,99-1,96) | 0,056   |
| Sexo femenino                        | 212 (52,9)                                  | 117 (56,0)                                  | 1,13 (0,81-1,59) | 0,464   |
| Sin estudios/estudios primarios      | 287 (72,5)                                  | 157 (75,5)                                  | 1,17 (0,80-1,72) | 0,426   |
| Casado/en pareja                     | 173 (43,1)                                  | 80 (38,3)                                   | 0,82 (0,58-1,15) | 0,247   |
| Reside en zona rural                 | 83 (20,7)                                   | 54 (25,8)                                   | 1,34 (0,90-1,98) | 0,149   |
| Institucionalizado                   | 36 (9,0)                                    | 16 (7,7)                                    | 0,84 (0,46-1,55) | 0,579   |
| Cuidador familiar                    | 298 (75,6)                                  | 175 (84,5)                                  | 1,76 (1,13-2,74) | 0,011   |
| > 2 ingresos previos por IC          | 112 (27,9)                                  | 88 (42,1)                                   | 1,88 (1,32-2,66) | < 0,001 |
| Tiempo evolución de IC ≥ 4 años      | 193 (48,4)                                  | 123 (58,9)                                  | 1,53 (1,09-2,14) | 0,014   |
| <i>Situación funcional</i>           |                                             |                                             |                  |         |
| Clase avanzada de la NYHA            | 180 (44,9)                                  | 109 (52,2)                                  | 1,34 (0,96-1,87) | 0,088   |
| FRAIL > 2 puntos                     | 234 (58,4)                                  | 125 (59,8)                                  | 1,06 (0,76-1,49) | 0,729   |
| Índice de Barthel < 80               | 151 (37,7)                                  | 111 (53,1)                                  | 1,87 (1,34-2,63) | < 0,001 |
| <i>Comorbilidades</i>                |                                             |                                             |                  |         |
| Diabetes mellitus                    | 169 (42,1)                                  | 90 (43,1)                                   | 1,04 (0,74-1,46) | 0,828   |
| EPOC                                 | 101 (25,2)                                  | 55 (26,3)                                   | 1,06 (0,72-1,55) | 0,762   |
| Hipertensión arterial                | 353 (88,0)                                  | 192 (91,9)                                  | 1,54 (0,86-2,74) | 0,145   |
| Arteriopatía periférica              | 63 (15,7)                                   | 35 (12,0)                                   | 0,73 (0,44-1,20) | 0,211   |
| Accidente cerebrovascular            | 71 (17,7)                                   | 29 (13,9)                                   | 0,75 (0,47-1,20) | 0,225   |
| Enfermedad renal crónica             | 250 (62,3)                                  | 133 (63,6)                                  | 1,06 (0,75-1,50) | 0,754   |
| Anemia                               | 240 (60,0)                                  | 128 (61,2)                                  | 1,06 (0,75-1,49) | 0,738   |
| Demencia                             | 18 (4,5)                                    | 8 (3,8)                                     | 0,85 (0,36-1,98) | 0,701   |
| FA/aleteo                            | 294 (73,3)                                  | 157 (75,1)                                  | 1,10 (0,75-1,61) | 0,630   |
| Valvulopatía moderada-grave          | 193 (48,1)                                  | 103 (49,3)                                  | 1,05 (0,75-1,46) | 0,787   |
| Cardiopatía isquémica                | 108 (26,9)                                  | 50 (23,9)                                   | 0,85 (0,58-1,26) | 0,421   |
| Dispositivos                         | 51 (12,7)                                   | 35 (16,7)                                   | 1,38 (0,86-2,20) | 0,175   |
| <i>FEVI y péptidos natriuréticos</i> |                                             |                                             |                  |         |
| FEVI < 50%                           | 53 (13,4)                                   | 33 (15,9)                                   | 1,22 (0,76-1,96) | 0,400   |
| NT-proBNP > 4.483 pg/ml              | 170 (46,6)                                  | 97 (52,2)                                   | 1,25 (0,88-1,78) | 0,216   |
| <i>Preferencias del paciente</i>     |                                             |                                             |                  |         |
| Prioriza longevidad                  | 28 (7,1)                                    | 16 (7,8)                                    | 1,10 (0,58-2,08) | 0,775   |
| Sí RCP/no decidido                   | 275 (70,2)                                  | 152 (74,1)                                  | 1,22 (0,83-1,78) | 0,305   |
| Deseo de fallecer en el hospital     | 153 (39,7)                                  | 89 (43,4)                                   | 1,16 (0,83-1,64) | 0,388   |
| Voluntad de solicitar la eutanasia   | 65 (16,5)                                   | 27 (13,1)                                   | 0,76 (0,47-1,23) | 0,268   |

EPOC: enfermedad pulmonar obstructiva crónica; FA: fibrilación auricular; FEVI: fracción de eyección del ventrículo izquierdo; IC: insuficiencia cardíaca; IC95%: intervalo de confianza del 95%; NT-proBNP: fracción aminoterminal del propéptido natriurético cerebral (tipo B); NYHA: *New York Heart Association*; OR: *odds ratio*; RCP: reanimación cardiopulmonar.
